CORRECTION

# Correction: The Inhibition of N-Glycosylation of Glycoprotein 130 Molecule Abolishes STAT3 Activation by IL-6 Family Cytokines in Cultured Cardiac Myocytes

The PLOS ONE Staff

The author's initial, TM, is missing from the funding statement. The correct funding statement is given below.

This study was supported by a grant-in-aid for scientific research from the Japan society for the promotion of science; YF, HN, TM, MM. This study was supported by MEXT/JSPS KAKENHI Grant Numbers 23390057, 26293054, 25860061 and 22590160. The funders had no role in study design, data collection and analysis, decision to publish, or preparation of the manuscript.

## Reference

1. Matsuo R, Morihara H, Mohri T, Murasawa S, Takewaki K, Nakayama H, et al. (2014) The Inhibition of N-Glycosylation of Glycoprotein 130 Molecule Abolishes STAT3 Activation by IL-6 Family Cytokines in Cultured Cardiac Myocytes. PLoS ONE 9(10): e111097. doi: [10.1371/journal.pone.0111097](https://doi.org/10.1371/journal.pone.0111097) PMID: [25340554](https://pubmed.ncbi.nlm.nih.gov/25340554/)

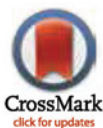

## OPEN ACCESS

**Citation:** The PLOS ONE Staff (2015) Correction: The Inhibition of N-Glycosylation of Glycoprotein 130 Molecule Abolishes STAT3 Activation by IL-6 Family Cytokines in Cultured Cardiac Myocytes. PLoS ONE 10(3): e0122930. doi:10.1371/journal.pone.0122930

**Published:** March 31, 2015

**Copyright:** © 2015 The PLOS ONE Staff. This is an open access article distributed under the terms of the [Creative Commons Attribution License](https://creativecommons.org/licenses/by/4.0/), which permits unrestricted use, distribution, and reproduction in any medium, provided the original author and source are credited.
